1 When to care and when to kill: termites shape their collective  
2 response based on stage of infection

3

4 Hannah E. Davis<sup>1</sup>, Stefania Meconcelli<sup>1,2</sup>, Renate Radek<sup>1</sup>, Dino P. McMahon<sup>1,2</sup>

5

6 <sup>1</sup> Institut für Biologie, Freie Universität Berlin, Königin-Luise-Str. 1-3, 14195 Berlin, Germany

7 <sup>2</sup> Department for Materials and Environment, BAM Federal Institute for Materials Research  
8 and Testing, Unter den Eichen 87, 12205 Berlin, Germany

9

10 Corresponding authors:

11 Dino P. McMahon: [dino.mcmahon@fu-berlin.de](mailto:dino.mcmahon@fu-berlin.de)

12 Hannah E. Davis: [hannah.e.davis@hedavis.net](mailto:hannah.e.davis@hedavis.net)

13

## 14 Abstract

15 Termites defend their colonies from disease using an array of social behaviours, including  
16 allogrooming, cannibalism, and burial. We tested how groups of eastern subterranean  
17 termites (*Reticulitermes flavipes*) deploy these behaviours when presented with a nestmate  
18 at different stages of infection with the entomopathogenic fungus *Metarhizium anisopliae*. As  
19 expected, the termites groomed pathogen-exposed individuals significantly more than mock-  
20 treated controls; however, grooming levels were significantly higher after spore germination  
21 than before. Cannibalism became prevalent only after exposed termites became visibly ill,  
22 and burial was rarely observed. These results demonstrate that termites employ different  
23 strategies depending on the stage of infection that they encounter. Grooming intensity is  
24 linked not only to pathogen presence, but also to germination status, and, given the temporal  
25 correlation between cannibalism and visible signs of illness, the host may play a role in  
26 triggering its own sacrifice.

## 27 Introduction

28 Social insects have evolved collective behaviours to protect their colonies from disease.  
29 These social immune defences, which include pathogen avoidance, prophylactic secretions,  
30 grooming, and corpse disposal, act to protect the colony as a whole, at times at the expense  
31 of individual members [1, 2]. In this latter case, sick colony members are identified and killed  
32 to prevent the spread of disease [1, 3, 4]. Regulation is therefore essential, both to prevent  
33 unnecessary killing and to allow the colony to dynamically adjust its investment in other  
34 defences [1].

35 Of all the social insects, the social Hymenoptera are the most well-studied. In honeybees  
36 (*Apis* spp. Linnaeus) activation of the physiological immune system by an infection results in  
37 a changed cuticular hydrocarbon profile [5], which can then trigger the removal of the  
38 infected bee by other members of the hive [6]. Likewise, workers respond to volatiles emitted  
39 by sick or injured brood by removing them from the hive [7, 8], and factors external to the  
40 host, such as the odour of a parasite or pathogen inside a brood cell [9], can also play a role.  
41 In ants, the situation is similar: invasive garden ant (*Lasius neglectus* Van Loon, Boomsma &  
42 Andrásfalvy) workers groom fungus-exposed pupae to prevent disease, but kill them if  
43 alerted to an internal infection by a change in cuticular hydrocarbons [4]. European fire ant  
44 (*Myrmica rubra* (Linnaeus)) workers also behave more aggressively toward fungus-infected  
45 adult nestmates once internal proliferation has begun [10].

46 Comparatively little is known about how termites (Blattodea: infraorder Isoptera) shape their  
47 social immune response based on the stage of infection encountered. There is broad  
48 consensus that the initial response to a pathogen-exposed nestmate is dominated by intense  
49 allogrooming [11-15], and cannibalism becomes more prevalent at some later stage [12, 16,

50 17]; however, when the switch occurs remains unclear. Although it has long been known that  
51 termites eat both the sick and the dead [18-20], with individuals most commonly eaten when  
52 “moribund but not yet dead” [3], no study to date has attempted to identify the stage of  
53 infection at which the risk of cannibalism first begins to increase. Should a termite die from  
54 an infection, or for any other reason, necromones attract worker termites to the corpse, which  
55 they preferentially eat (necrophagy) [21]. Corpses that are too old [22] or too numerous to  
56 consume [23] are defecated on and then buried, isolating them from the colony [18]. Burial of  
57 live individuals has also been observed [11, 24].

58 Each component of the social immune response serves to prevent a pathogen from reaching  
59 the next stage in its life cycle, and ultimately to prevent an epizootic, but it will only be  
60 effective if deployed at the appropriate time. In the specific case of *Metarhizium anisopliae*  
61 (Metchnikoff) Sorokin (Ascomycota: Hypocreales), a generalist entomopathogenic fungus,  
62 allogrooming is highly effective in removing most infectious conidia from the cuticle before  
63 they can germinate [12, 15, 25, 26]. Groomers can safely swallow the conidia [15, 27], and  
64 low-level infections acquired through contact with an infected nestmate may even boost  
65 individual anti-fungal defences [13]. Once an internal infection has been established,  
66 however, allogrooming is no longer effective [4]. The infected termite cannot be saved, and  
67 the longer it is left alive, the higher the colony-level fitness cost: resources that it consumes  
68 will go to support fungal growth, it will become increasingly unable to work, and should the  
69 fungus sporulate from its corpse, it will put the entire colony at risk [28].

70 We would therefore expect to see a switch from a grooming-dominated collective immune  
71 response to a cannibalism- and/or burial-dominated response beginning at the earliest point  
72 at which termites can detect a terminal infection. To address this, we used the eastern  
73 subterranean termite, *Reticulitermes flavipes* (Kollar), and the entomopathogenic fungus *M.*  
74 *anisopliae* to examine how the stage of infection encountered by a colony determines the  
75 collective response. Our hypotheses were that i) allogrooming would be most intense before  
76 conidial germination; ii) the shift to cannibalism would begin shortly after conidial  
77 germination. Contrary to expectations, we found that levels of grooming rose significantly  
78 after conidial germination, and that cannibalistic behaviours coincided with termite sickness,  
79 with a more rapid switch to cannibalism at later stages. By dividing the infection into stages  
80 [29] and studying how the social immune response differs over time, our study sheds new  
81 light on the processes by which social Blattodea identify fatally ill colony members and  
82 thereby defend their colonies from disease.

## 83 Materials and Methods

### 84 Insects

85 Three captive eastern subterranean termite (*Reticulitermes flavipes*) colonies at the Federal  
86 Institute for Materials Research and Testing (Bundesanstalt für Materialforschung und -  
87 prüfung, BAM) in Berlin, Germany were used in these experiments: colonies E, 5, and 8.  
88 Colony E was collected in Soulac-sur-Mer, France, in 2015. It was maintained in a dark room  
89 at 28°C, 83% humidity. Colonies 5 and 8 were collected in the vicinity of Le Grand-Village-  
90 Plage, Île d'Oléron, France, in 1994 and maintained in a separate dark room at 26°C, 84%  
91 humidity. Colonies were housed in physically separate sheet metal tanks as described by  
92 Günther Becker [30]. All three colonies appeared healthy.

93 Cardboard bait was used as the primary method for extracting termites from their parent  
94 colonies. From collection until staining or transfer to Petri dish nests, termites from the same  
95 colony were maintained in a plastic box containing cellulose pads (Pall Corporation, Port  
96 Washington, USA) moistened with tap water. Each colony box was maintained under the  
97 same temperature and humidity conditions as the parent colony, and tap water and new  
98 cellulose pads were added as needed.

### 99 Fungi

100 The entomopathogenic fungus *Metarhizium anisopliae* DSM 1490 was maintained on potato  
101 dextrose agar (PDA) at 25°C in the dark. The plate used in the experiment was the result of  
102 one passage from a plate grown under identical conditions from a cryogenic stock.

### 103 Experimental design

104 There are three key points in the fungal life cycle at which termites may detect a terminal  
105 infection. The earliest is after conidial germination: as a consequence of the thin,  
106 unsclerotised termite cuticle and the limited ability of the individual immune system to  
107 encapsulate germ tubes [31], an internal infection can be established within hours of  
108 germination (Supplementary Material), and the risks to the colony at this stage may outweigh  
109 the benefits of saving an individual on the cusp of infection. The second point is after internal  
110 infection has begun and the host has begun to show visible signs of disease [31]. Given the  
111 rapidity with which this fungus infects and kills its termite host [32], it is possible that sickness  
112 cues such as volatiles or modifications to the cuticular hydrocarbon profile, if present, may  
113 take time to produce. The last point at which the colony might detect and respond to a  
114 terminal infection is therefore shortly before the termite's death.

115 Based on these considerations, we chose to observe the collective responses to a worker  
116 termite at one the following four stages of infection: (1) the conidia have attached but not  
117 germinated; (2) the conidia have begun to germinate but the host remains healthy; (3) the

118 host is moribund (an internal infection has been established); and (4) the host is near death.  
119 To obtain individuals at each stage of infection, termites were treated with a  $1 \times 10^8$   
120 conidia/mL suspension of *M. anisopliae* or 0.05% Tween 80 as a control, then maintained  
121 individually for 2, 12, 15, or 20 hours. These four incubation times were chosen based on the  
122 results of a preliminary experiment (Supplementary Material). The reasoning for each is also  
123 summarised in Table 1.

124 Table 1. Reasoning for the incubation times chosen in this experiment

| <b>Incubation time</b> | <b>Reasoning</b>                                     |
|------------------------|------------------------------------------------------|
| 2 h                    | Germination has not yet begun                        |
| 12 h                   | Germination has begun; termites still appear healthy |
| 15 h                   | Termites moribund                                    |
| 20 h                   | Termites almost dead                                 |

125 Three colonies were used in the experiment. For each of the four incubation times, there  
126 were 24 replicates of the *M. anisopliae* treatment (8 per colony for three colonies) and 12 of  
127 the control treatment (4 per colony) to control for the effects of handling and isolation. These  
128 were split evenly across two experimental replicates. In the first experimental replicate, the  
129 conidia used in the experiment were freshly harvested from half of one PDA plate. In the  
130 second experimental replicate, conidia were freshly harvested from the other half.

### 131 Preparation of Petri dish nests

132 Each Petri dish nest consisted of a Petri dish (94 x 16 mm, without vents), two thick Pall  
133 cellulose pads (45.5 mm diameter, 0.9 mm thick), two thin Whatman No. 5 filter paper discs  
134 (47 mm diameter, 0.2 mm thick), and one standard glass microscope slide (76 x 26 mm).  
135 Each thick cellulose pad was placed on top of a thin filter paper disc. The two paper stacks  
136 were then placed side-by-side in the Petri dish, with one of the stacks trimmed on one side to  
137 fit. Finally, a glass microscope slide was placed on top (Figure 1). The thickness of the paper  
138 stacks (ca. 1.1 mm) was experimentally determined such that when termites dug in the paper  
139 under the glass slide, they were able to move freely but had too little space to leave an  
140 opaque “ceiling” over their tunnels. The paper was moistened with 3.5 mL tap water.

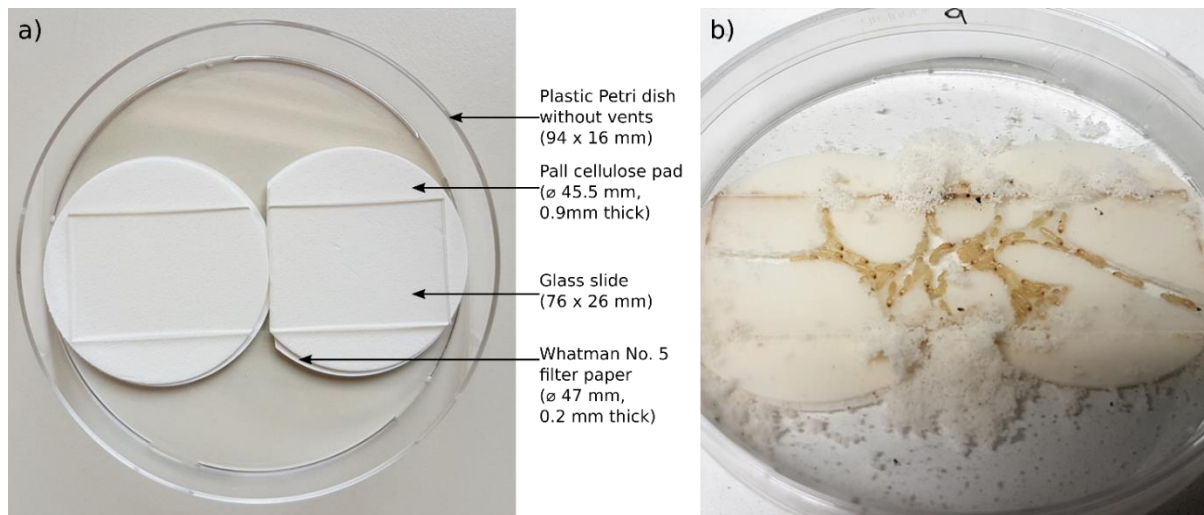

141

142 Figure 1. a) Petri dish nest design; b) Petri dish nest after two weeks of termite activity.

143 Forty-five workers were added to each Petri dish, 1 soldier was added to 20 dishes per  
144 colony (10 in the first experimental replicate, 10 in the second), and every dish received 3  
145 representatives of the reproductive caste, with the exception of 7 plates from colony 5, which  
146 only received 2 in the second experimental replicate due to difficulty retrieving nymphs from  
147 the colony. *R. flavipes* caste ratios vary [33], but workers are by far the dominant caste [19].  
148 The numbers of reproductives and soldiers were taken into account in the statistical analysis,  
149 but neither had a significant effect.

150 In total, each dish contained 48 or 49 termites, not including the focal individual. Becker [30]  
151 recommends using a minimum of approximately 50 termites to maintain *R. flavipes* in the lab.  
152 In pilot experiments, we confirmed that groups this size could survive for three or more  
153 weeks in a Petri dish setup, and that they displayed typical social and hygienic behaviours,  
154 including cannibalism and burial. Smaller groups had lower survivorship and sometimes  
155 displayed abnormal behaviour, such as leaving corpses uneaten and unburied.

156 The dishes were sealed with parafilm to prevent desiccation and left in a dark room at 27°C,  
157 70% humidity for two weeks. At least half an hour prior to a behavioural experiment, a cotton  
158 swab was used to sweep debris off the glass slide. This was necessary to ensure a clear  
159 view into the nest.

## 160 Marking focal termites

161 Focal termites were marked with Nile blue (AppliChem GmbH, Darmstadt, Germany), a  
162 moderately toxic fat-soluble stain that has previously been used to mark termites in  
163 behavioural studies [16, 19, 34]. As an internal stain, it cannot be removed and does not  
164 interfere with grooming.

165 Our protocol is a faster version of Evans' fast marking technique [35]. As termites will  
166 swallow any liquid that they are immersed in, we dispensed with his desiccation step and

167 immersed all termites that needed to be stained in 0.025% Nile blue. This is the minimum  
168 concentration needed to reliably stain *R. flavipes*.

169 Large ( $\geq 4$  mm) workers were poured into 2 mL microcentrifuge tubes, one per colony, using  
170 a small funnel. Only workers that appeared healthy and active were used. Sufficient 0.025%  
171 Nile blue was added to cover them, and they were flicked to mix for 1 minute, then tipped out  
172 onto a dry cellulose pad. Initially, all appeared unstained. The termites were transferred to  
173 one of three labelled round plastic containers (ca. 52mm inner diameter), one per colony,  
174 each lined with a clean cellulose pad moistened with 1 mL tap water and closed with a tight-  
175 fitting lid, and then left overnight in a dark room at 27°C, 70% humidity. Only termites that  
176 were successfully stained and appeared healthy and active were used in the subsequent  
177 experiment. Because the intensity of the colour varied widely, and because of the known  
178 toxicity of the stain, termites of different shades were randomly distributed amongst  
179 treatments and controls.

## 180 Preparation of conidial suspensions

181 Conidia were harvested after a minimum of one month of growth. A sterile cotton swab  
182 moistened with sterile 0.05% Tween 80 was used to wipe the conidia off the plate and  
183 suspend them in sterile 0.05% Tween 80. The suspension was inverted and vortexed to mix,  
184 then filtered through a piece of sterile cheese cloth that had been folded to reduce the  
185 effective pore size. The filtered conidia were washed by centrifuging for 10 minutes at 5000 g  
186 in a centrifuge cooled to 4°C, discarding the supernatant, and resuspending the pellet in  
187 sterile 0.05% Tween 80. This step was performed a total of three times.

188 A BLAUBRAND® Thoma counting chamber (depth 0.1 mm; BRAND, Wertheim, Germany)  
189 was used to estimate the concentration of the conidial suspension. Conidial suspensions  
190 were adjusted to  $1 \times 10^8$  conidia/mL with 0.05% Tween 80, aliquoted for ease of use, and  
191 used within 48 hours. Suspensions were stored at 4°C when not in use.

192 To ensure that the conidia were viable, PDA plates were streaked with conidia from an  
193 aliquot of the same  $1 \times 10^8$  conidia/mL suspension used to inoculate the termites. The plates  
194 were parafilmed and placed upside-down in the same room as the termites (27°C, 70%  
195 humidity). After 21 hours, at least 300 conidia were evaluated for germination at 200 to 400x  
196 magnification on one of the plates to calculate the germination rate. A conidium was  
197 considered germinated if the length of the germ tube was at least half the diameter of the  
198 conidium. For confirmation, at least 100 conidia were evaluated in the same manner on the  
199 second plate. The germination rate was ca. 94% in the first experimental replicate and ca.  
200 98% in the second. A germination rate lower than 90% would have indicated a problem with  
201 the conidial suspension.

## 202 Inoculation with conidia or 0.05% Tween 80

203 For the *M. anisopliae* treatment, previously-marked (blue) termites were placed in a round-  
204 bottomed 2 mL microcentrifuge tube, then covered with the  $1 \times 10^8$  conidia/mL suspension to  
205 a volume of 42  $\mu$ L per termite. The tube was flicked to mix for 10 seconds, then poured out  
206 onto a dry cellulose pad. Termites that remained inside were tapped out, or, if needed,  
207 carefully removed with soft forceps. When the termites had recovered enough to walk, they  
208 were transferred one-by-one into separate Petri dishes, each containing a cellulose pad  
209 moistened with 1 mL tap water. The dishes were sealed with parafilm to prevent desiccation.  
210 Control termites were immersed in sterile 0.05% Tween 80 (42  $\mu$ L per termite) instead of the  
211 conidial suspension and handled in the same way. This inoculation method is a variation on  
212 that used by Yanagawa and Shimizu [15].

213 The *M. anisopliae*-treated and control termites were incubated for 2, 12, 15, or 20 hours at  
214 27°C, 70% humidity before use in the behavioural experiment.

## 215 Behaviour recording

216 After 2, 12, 15, or 20 hours of incubation, the blue *M. anisopliae*-treated and control focal  
217 termites were added individually to the Petri dish nests. All dishes were resealed with  
218 parafilm. This took approximately 15 minutes, and the observation period began immediately  
219 after the last dish was sealed. Termites that appeared injured or dead at the beginning of an  
220 observation period were excluded from the analysis. In total, two replicates of the 2h/*M.a+* (2  
221 hours of incubation with *M. anisopliae*) treatment, three replicates of the 15h/*M.a+* (15 hours  
222 of incubation with *M. anisopliae*) treatment, and one replicate of the 20h/*M.a+* (20 hours of  
223 incubation with *M. anisopliae*) treatment were excluded due to suspected handling injuries.

224 Scan sampling [36] was used to observe the interactions between the focal termite and its  
225 nestmates within each Petri dish nest. Scans typically took less than 1 minute. They were  
226 performed every 5 minutes for a total of 3 hours using a magnifying glass (up to 3x  
227 magnification) to better distinguish between similar behaviours and a Samsung S7  
228 smartphone as a digital voice recorder. All observations were made at 27°C, 70% humidity  
229 under bright, constant overhead light. As *R. flavipes* are known to respond strongly to  
230 vibrational stimuli [37], Petri dishes were not moved or opened after they had been sealed.

231 States were defined prior to the experiment. We classified behaviours into visually  
232 distinguishable, non-overlapping categories with a focus on interactions (and their aftermath)  
233 that are relevant to social immunity:

234 **Groomed by n:** Focal termite is being groomed by n nestmates with no evidence of  
235 biting.

236 **Bitten:** Focal termite is being bitten by 1 or more nestmates.



237 **Dismembered:** Focal termite is missing one or more tagmata.

238 **Dead-ignored:** Focal termite is lying completely motionless, but not buried or  
239 dismembered. Nestmates are not interacting with it.

240 **Not visible:** Focal termite is in a section of the nest where its behaviour and  
241 interactions with nestmates cannot be seen.

242 **Other:** Focal termite is alive, intact, and unburied, but nestmates are not interacting  
243 with it.

## 244 Statistical analysis

245 All statistical analyses were performed using R (version 3.4.3) [38].

### 246 *Grooming*

247 The amount of grooming in each treatment (number of grooming states/total observed  
248 states) was compared by fitting a generalised linear mixed model to the data using the glmer  
249 function in the package lme4 [39]. Because we were working with proportion data, we used a  
250 binomial error structure [40].

251 The model contained an interaction between incubation time and *M. anisopliae* presence as  
252 a fixed effect and two random effects: colony nested within experimental replicate and plate  
253 ID. We initially included soldier number and reproductive number as fixed effects, then  
254 sequentially removed them during model simplification, using the anova function to ascertain  
255 if the removal of a parameter would lead to a significant change in deviance and to perform  
256 likelihood ratio test comparisons. The final model was tested for overdispersion using the  
257 dispersion\_glmer function in the package blmeco [41]. A scale parameter between 0.75 and  
258 1.4 indicates no overdispersion: for this model, it was 1.004. All post hoc pairwise  
259 comparisons were performed using the glht function from the multcomp package [42] with  
260 Tukey correction.

261 To analyse grooming intensity, we used glmer to fit a generalised linear mixed model to the  
262 data with the total number of groomers in each replicate as the response variable and a  
263 Poisson error structure. Two replicates (one in the 2 hour control treatment, one in the 15  
264 hour control treatment) were excluded from the analysis because no grooming states were  
265 observed. The model contained an interaction between incubation time and *M. anisopliae*  
266 presence as a fixed effect and two random effects: colony nested within experimental  
267 replicate and plate ID. The log of the number of grooming states was used as an offset. We  
268 initially included soldier number and reproductive number as fixed effects, then sequentially  
269 removed them during model simplification, using anova as above to compare models. The  
270 scale parameter of the final model was 0.861. All post hoc pairwise comparisons were  
271 performed using glht with Tukey correction.

## 272 *Cannibalism*

273 “Bitten” and “dismembered” states were combined into a single “cannibalism” state. We  
274 modelled the onset of cannibalistic behaviour using survival curves. The data were plotted  
275 using survfit from the survival package [43, 44] and ggsvplot from the survminer package  
276 [45]. We used a mixed effects Cox model (coxme from the coxme package [46]) to compare  
277 the curves.

278 The model contained an interaction between incubation time and *M. anisopliae* presence as  
279 a fixed effect, and colony nested within experimental replicate as a random effect. We initially  
280 included soldier number and reproductive number as fixed effects, then sequentially removed  
281 them during model simplification, using the anova function as above to compare models. In  
282 the survival curve analysis, all control data was initially right-censored; in order to fit a mixed  
283 effects Cox model to the data, it was necessary to uncensor one arbitrarily-selected control  
284 replicate from each incubation time treatment following Tragust et al. [47]. The glht function  
285 was used to perform post-hoc pairwise comparisons with Tukey correction.

## 286 Results

### 287 Patterns of behaviour

288 Focal termites were visible throughout the observation period, and there were no instances  
289 of focal termite corpses being ignored. Behavioural patterns (Figure 2) in the control  
290 treatments (2h/*M.a.*-, 12h/*M.a.*-, 15h/*M.a.*-, 20h/*M.a.*-) were broadly similar, dominated by  
291 states in the “other” category, with low levels of grooming and no cannibalism or burial  
292 states. The majority of states in 2h/*M.a.*+ were in the “other” category, but grooming was  
293 elevated over the control. 12h/*M.a.*+ was dominated by high levels of grooming that slowly  
294 decreased over the observation period, while “other” states slowly increased. Cannibalism  
295 was observed, but primarily in the last half hour of the observation period. No burial states  
296 were recorded. Both 15h/*M.a.*+ and 20h/*M.a.*+ were characterised by high levels of intense  
297 grooming immediately after the focal termites were introduced. Cannibalism began shortly  
298 thereafter, increasing more rapidly in 20h/*M.a.*+ and completely replacing grooming before  
299 the end of the observation period. Burial was observed in both treatments toward the end of  
300 the observation period, but only in a small proportion of states.

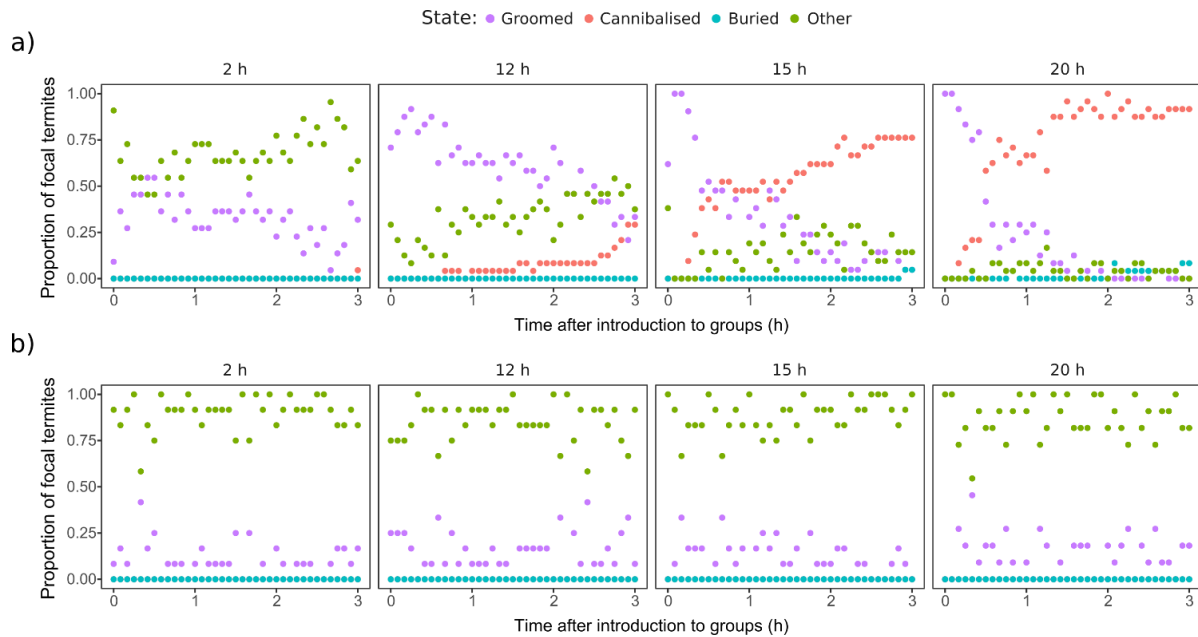

301

302 Figure 2. Patterns of behaviour over time during the three-hour observation period for a) *M. anisopliae* and b) control treatments. Each  
303 point represents the proportion of focal termites that were observed in a given state during that scan. When more than one state was  
304 present at the same proportion (0.50 or 0.00), the points overlap.

## 305 Grooming

306 The proportion of states classified as grooming in the 12h/*M.a+* treatment was significantly  
307 elevated over all other *M. anisopliae* treatments (12h/*M.a+* vs. 2h/*M.a+*  $z=5.533$   $p<0.001$ ;  
308 15h/*M.a+* vs. 12h/*M.a+*  $z=-5.511$   $p<0.001$ ; 20h/*M.a+* vs. 12h/*M.a+*  $z=-7.717$   $p<0.001$ ) (Figure  
309 3, Table S1). Grooming was significantly elevated over the controls in all *M. anisopliae*  
310 treatments except 20h/*M.a+*, which was only significantly different from 2h/*M.a-* (*M.*  
311 *anisopliae* treatments vs. corresponding controls: 2h/*M.a+* vs. 2h/*M.a-*  $z=4.844$   $p<0.001$ ;  
312 12h/*M.a+* vs. 12h/*M.a-*  $z=7.834$   $p<0.001$ ; 15h/*M.a+* vs. 15h/*M.a-*  $z=4.417$   $p<0.001$ ). The  
313 controls (2h/*M.a-*, 12h/*M.a-*, 15h/*M.a-*, 20h/*M.a-*) were not significantly different from each  
314 other. No significant difference was observed between 2h/*M.a+*, 15h/*M.a+*, and 20h/*M.a+*.  
315 Low levels of grooming in 15h/*M.a+* and 20h/*M.a+* correspond with a high proportion of  
316 cannibalism states in both treatments (Figure 2, Figure 5).

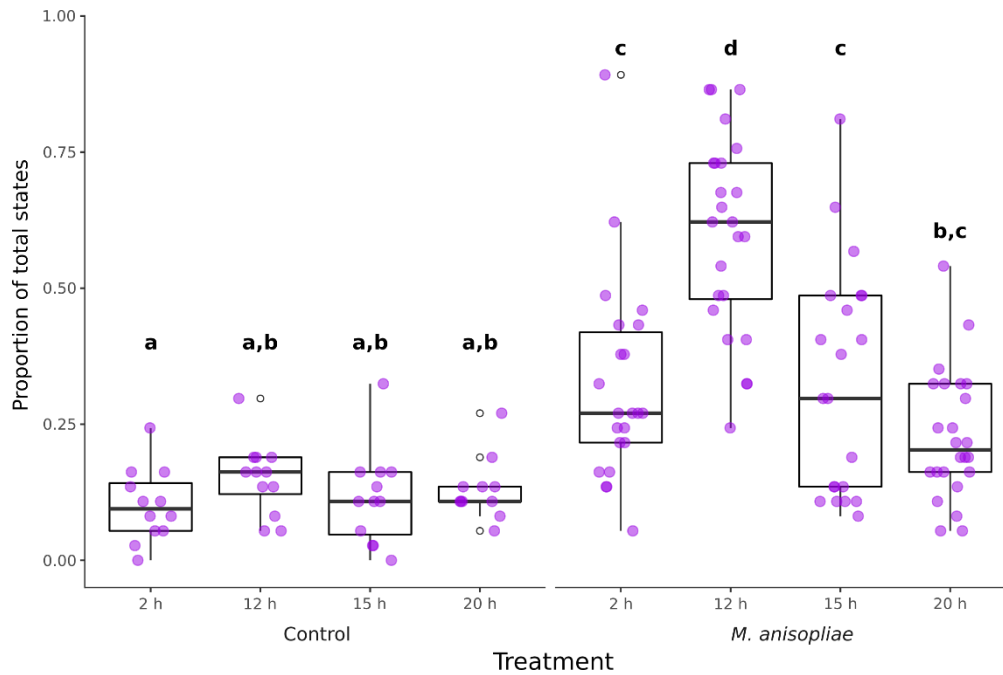

317

318 Figure 3. Grooming as a proportion of total states. Treatments marked with different letters were significantly different (Table S1).  
319 Lower and upper hinges correspond to first and third quartiles, the upper whisker extends to the largest value if it is no greater than 1.5  
320 times the inter-quartile range from the hinge, and the lower whisker extends to the smallest value if it is no smaller than 1.5 times the  
321 inter-quartile range from the hinge.

322 Only workers were observed grooming the focal termites, and grooming was visibly more  
323 intense, involving a significantly higher number of groomers, in 12h/*M.a+*, 15h/*M.a+*, and  
324 20h/*M.a+* (12h/*M.a+* vs. 2h/*M.a+*  $z=3.299$   $p=0.01834$ ; 15h/*M.a+* vs. 2h/*M.a+*  $z=7.915$   
325  $p<0.001$ ; 15h/*M.a+* vs. 12h/*M.a+*  $z=5.757$   $p<0.001$ ; 20h/*M.a+* vs. 2h/*M.a+*  $z=8.077$   $p<0.001$ ;  
326 20h/*M.a+* vs. 12h/*M.a+*  $z=5.873$   $p<0.001$ ) (Figure 4, Table S2). 2h/*M.a+* was not significantly  
327 different from any of the controls, and 15h/*M.a+* and 20h/*M.a+* were not significantly different  
328 from each other. Non-focal termites in treatments with more intense grooming were  
329 frequently observed to engage in vibratory displays (jittering), a known pathogen alarm  
330 response [11, 48]; however, our sampling method, which focused on direct interactions with  
331 the focal individual, precluded analysis of this behaviour.

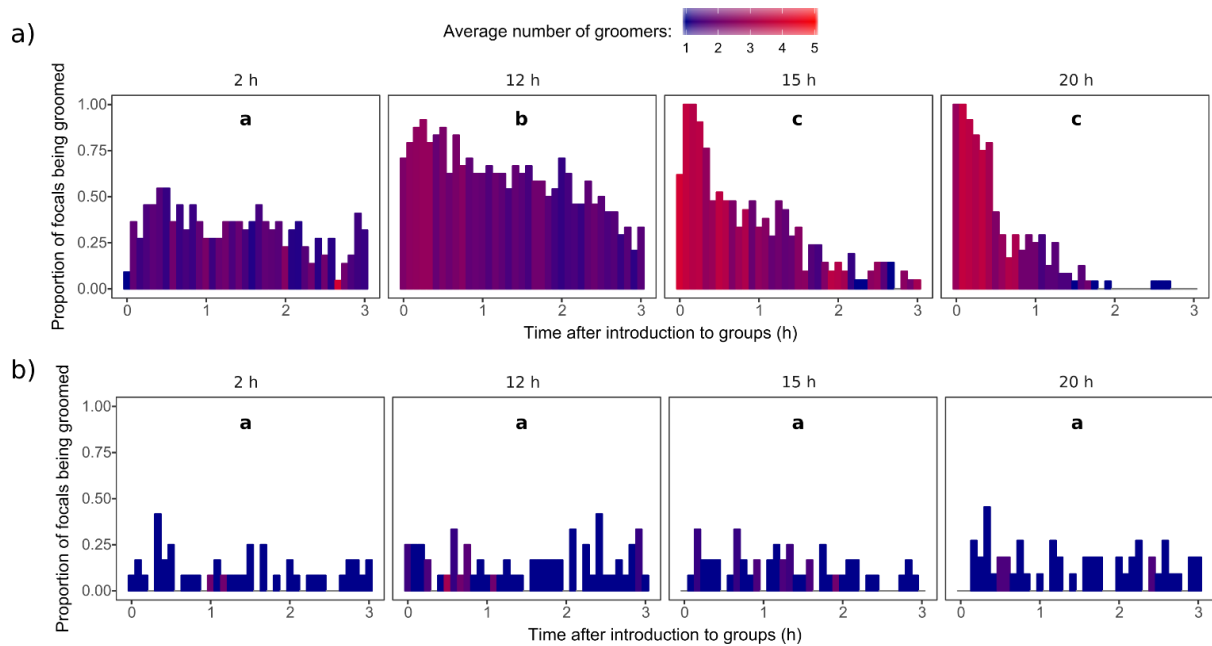

332

333 Figure 4. Proportion of focal termites in the (a) *M. anisopliae* or (b) control treatments observed being groomed by nestmates in each  
334 scan (as in Figure 2), with the fill colour representing the average number of groomers involved. Different letters correspond to  
335 significant differences in the overall number of groomers after the number of grooming states is taken into account (Table S2).

## 336 Cannibalism

337 The probability of remaining unharmed during the observation period was significantly  
338 different from the controls, which experienced no cannibalism, in the 15h/*M.a+* ( $z=3.958$   
339  $p=0.00167$ ) and 20h/*M.a+* ( $z=4.809$   $p<0.001$ ) treatments, but not in 2h/*M.a+* or 12h/*M.a+*  
340 (Table S3). The 15h/*M.a+* and 20h/*M.a+* treatments differed significantly from each other  
341 ( $z=3.006$ ,  $p=0.04437$ ), as well as from 2h/*M.a+* and 12h/*M.a+* (15h/*M.a+* vs. 2h/*M.a+*  
342  $z=4.550$   $p<0.001$ ; 15h/*M.a+* vs. 12h/*M.a+*  $z=5.233$   $p<0.001$ ; 20h/*M.a+* vs. 2h/*M.a+*  $z=5.469$   
343  $p<0.001$ ; 20h/*M.a+* vs. 12h/*M.a+*  $z=6.745$   $p<0.001$ ). This difference was characterised by an  
344 earlier onset of cannibalism in 20h/*M.a+* than in 15h/*M.a+* (Figure 5). In all but two cases, the  
345 first cannibalism-related state recorded was biting. In those two exceptions, both in  
346 15h/*M.a+*, it was dismemberment. The previous scan recorded intense grooming of the focal  
347 individual by 5 to 6 groomers: it is possible that that state was misidentified, or that biting  
348 began between scans. Cannibalism was performed primarily by workers, but on two  
349 occasions, a brachypterous neotenic was observed to also partake.

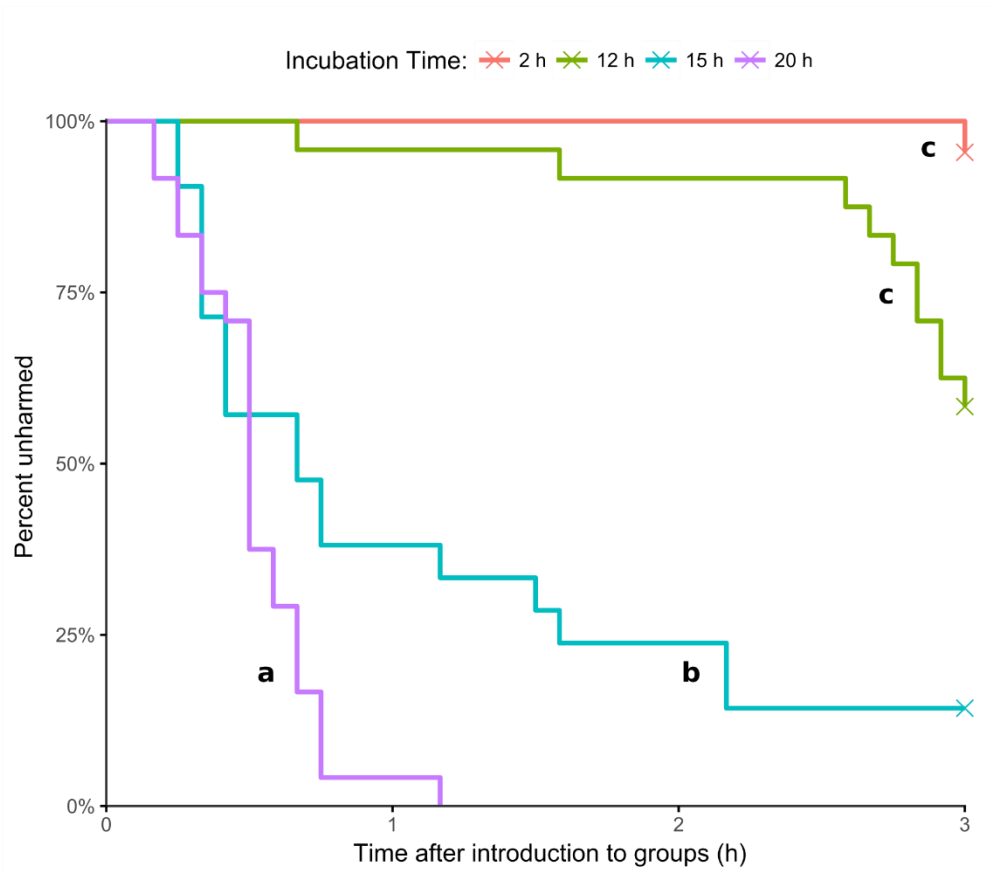

350

351 Figure 5. Percentage of *M. anisopliae*-treated focal termites that remained unharmed (not bitten or dismembered) over the three-hour  
352 observation period. X's indicate the presence of right-censored data (i.e. focal termites that were not harmed during the observation  
353 period). Treatments marked with the same letter were not significantly different, and neither "c" treatment (2h/*M.a+*, 12h/*M.a+*) was  
354 significantly different from the controls (not shown; all control individuals remained unharmed throughout the observation period)  
355 (Table S3).

## 356 Burial

357 Burial was observed in four plates: one 15h/*M.a+* replicate and three 20h/*M.a+* replicates.

358 This is too few for meaningful statistical analysis. In each case, the focal termite appeared to  
359 be alive but moribund and largely immobile at the beginning of the burial process. This  
360 immobility was caused by nestmates in one 20h/*M.a+* replicate: the legs were first bitten off,  
361 and the maimed termite was left for approximately half an hour before burial began.

362 There was no sudden switch from grooming or cannibalism to burial. In one 20h/*M.a+*  
363 replicate, the focal termite was initially groomed, then bitten, then had a piece of paper  
364 placed on top of it (burial), then groomed again for half an hour, during which time the paper  
365 was removed, then bitten again. Burial did not resume, and the termite was eventually  
366 dismembered.

## 367 Discussion

368 Our results demonstrate that *R. flavipes* colonies employ different collective immune defence  
369 strategies at different stages of infection with *M. anisopliae*. Before conidia germinate, the  
370 social immune response is dominated by grooming; however, contrary to our first hypothesis,

371 levels of grooming rise significantly after conidial germination, and it becomes visibly more  
372 intense. Contrary to our second hypothesis, the onset of cannibalistic behaviour coincides  
373 with the stage of infection in which the termite becomes moribund, with a more rapid switch  
374 to cannibalism at later stages. All cannibalised individuals were eaten alive. This is consistent  
375 with observations by Rosengaus and Traniello [3], who observed that termites were usually  
376 cannibalised when near death, but contradicts Strack [24], who observed more “agonism”  
377 toward healthy individuals that had been thickly dusted with conidia. Burial was rarely  
378 observed, reinforcing the view that termites preferentially eliminate sick individuals through  
379 cannibalism [3, 23].

380 The unexpectedly low levels of grooming observed before conidial germination may be  
381 explained by their weak attachment to the cuticle: since most conidia can be removed within  
382 hours by relatively few individuals [26], there may be no reason to divert resources away  
383 from other colony functions or endanger additional members of the colony. The effectiveness  
384 of allogrooming, even at the observed low intensity, can also be seen in survivorship studies  
385 [12]. Increased levels of grooming after germination, then, could be linked to increased  
386 physical difficulty removing fungal material, especially after germ tube penetration.

387 This explanation is unsatisfying, because the longer a pathogen persists on or in members of  
388 a colony, the more we would expect it to affect colony fitness. Conidia-exposed, non-  
389 moribund individuals are mobile and can transfer conidia to many colony members [13, 14],  
390 all of which would need to be groomed by workers that could otherwise be performing other  
391 tasks. Should the infection progress to the next stage, the risk to the colony would increase  
392 significantly. This should favour early “clearance” of the infection from the colony via  
393 aggregation and intense grooming of conidia-exposed individuals, but that is not what we  
394 observed.

395 A second possibility is that the fungus-associated molecules that stimulate grooming (e.g. the  
396 fungal “odour” [49]) are partly masked, or present in lower quantities, before germination.  
397 Based on response threshold models of division of labour in social insects [50], even partial  
398 masking would result in a weaker collective grooming response with fewer participating  
399 workers. This need not be a specific adaptation to evade termite social immunity, nor would  
400 we expect it in a generalist entomopathogen. Masking of immunogenic components of the  
401 fungal cell wall before (but not after) germination has previously been reported in an  
402 opportunistic human pathogen, *Aspergillus fumigatus* Fresenius [51]. Should this prove to be  
403 the case in *M. anisopliae*, it could be harnessed to develop strains with higher epizootic  
404 potential.

405 In contrast to grooming, in which fungal factors appear to be the primary trigger, the strong  
406 temporal correlation between moribundity and cannibalistic behaviour suggests that the host

407 plays a central role in its own sacrifice. Focal termites appeared healthy at 12 hours and  
408 moribund (a reliable sign of internal infection [31]) at 15, and cannibalism was only prevalent  
409 in the 15h/*M.a+* and 20h/*M.a+* treatments. Even in the 12h/*M.a+* treatment, which was not  
410 significantly different from the control, there was an uptick in cannibalism in the last half hour  
411 of the observation period, i.e. at approximately 14.5 hours post-exposure. With the caveat  
412 that this is a correlation, and that moribundity could coincide with some fungus-derived  
413 stimulus reaching the necessary threshold for cannibalism, the hypothesis that sick  
414 individuals might flag themselves for destruction is supported by research in the social  
415 Hymenoptera. Ant pupae “advertise” the presence of an internal infection through modified  
416 cuticular hydrocarbon profile [4], and aggressive behaviour was observed toward adults at  
417 the same stage of infection [10]; however, more work will be required to determine whether  
418 the social Blattodea and the social Hymenoptera have independently evolved separate  
419 mechanisms to identify fatally ill colony members, or if they have separately co-opted  
420 evolutionarily conserved sickness cues for social immune defence.

## 421 Conclusion

422 We have demonstrated that termites can deploy different collective immune defences when  
423 confronted with a worker at different stages of infection with an entomopathogenic fungus.  
424 Whereas grooming is favoured earlier in the infectious process, moribund individuals are  
425 readily sacrificed to protect the colony. Cannibalism appears to be triggered by some factor  
426 associated with moribundity: what this might be remains unclear. Paradoxically, the termites  
427 did not display a robust social immune response at the earliest stages, when conidia had not  
428 yet germinated, although grooming was somewhat elevated. This may indicate that the  
429 ungerminated fungus is less visible to the “social immune system” of the colony, but this  
430 hypothesis remains to be tested.

431 This study adds to the body of knowledge surrounding termite social immunity and sheds  
432 light on how colonies resist fungal disease and regulate destructive immune behaviours. By  
433 dividing the infection into stages [29] and studying how the social immune response differs  
434 over time, we can better understand how termites, and insects in general, defend their  
435 colonies from disease.

## 436 Acknowledgements

437 We thank R. Plarre and J. Rolff for discussion and support, as well as A. Herrmann, S. He,  
438 and especially Y. de Laval for assistance in the laboratory.

## 439 References

440 1. Cremer S., Armitage S.A., Schmid-Hempel P. 2007 Social Immunity. *Curr Biol* **17**(16), 693-702.  
441 (doi:10.1016/j.cub.2007.06.008).



- 442 2. Page P., Lin Z., Buawangpong N., Zheng H., Hu F., Neumann P., Chantawannakul P., Dietemann V. 2016  
443 Social apoptosis in honey bee superorganisms. *Sci Rep* **6**, 27210. (doi:10.1038/srep27210).
- 444 3. Rosengaus R., Traniello J. 2001 Disease susceptibility and the adaptive nature of colony demography in  
445 the dampwood termite *Zootermopsis angusticollis*. *Behavioral Ecology and Sociobiology* **50**(6), 546-556.  
446 (doi:10.1007/s002650100394).
- 447 4. Pull C.D., Ugelvig L.V., Wiesenhofer F., Grasse A.V., Tragust S., Schmitt T., Brown M.J.F., Cremer S. 2018  
448 Destructive disinfection of infected brood prevents systemic disease spread in ant colonies. *eLife* **7**, e32073.  
449 (doi:10.7554/eLife.32073.001).
- 450 5. Richard F.J., Aubert A., Grozinger C.M. 2008 Modulation of social interactions by immune stimulation  
451 in honey bee, *Apis mellifera*, workers. *BMC Biol* **6**, 50. (doi:10.1186/1741-7007-6-50).
- 452 6. Baracchi D., Fadda A., Turillazzi S. 2012 Evidence for antiseptic behaviour towards sick adult bees in  
453 honey bee colonies. *J Insect Physiol* **58**(12), 1589-1596. (doi:10.1016/j.jinsphys.2012.09.014).
- 454 7. Nazzi F., Della Vedova G., D'Agaro M. 2004 A semiochemical from brood cells infested by *Varroa*  
455  *destructor* triggers hygienic behaviour in *Apis mellifera*. *Apidologie* **35**(1), 65-70. (doi:10.1051/apido:2003065).
- 456 8. Spivak M., Downey D.L. 1998 Field Assays for Hygienic Behavior in Honey Bees (Hymenoptera:  
457 Apidae). *J Econ Entomol* **91**(1), 64-70. (doi:10.1093/jee/91.1.64).
- 458 9. Rosenkranz P., Tewarson N.C., Singh A., Engels W. 2015 Differential hygienic behaviour towards  
459 *Varroa jacobsoni* in capped worker brood of *Apis cerana* depends on alien scent adhering to the mites. *J Apic*  
460 *Res* **32**(2), 89-93. (doi:10.1080/00218839.1993.11101292).
- 461 10. Leclerc J.B., Detrain C. 2016 Ants detect but do not discriminate diseased workers within their nest.  
462 *Naturwissenschaften* **103**(7-8), 70. (doi:10.1007/s00114-016-1394-8).
- 463 11. Myles T.G. 2002 Alarm, aggregation, and defense by *Reticulitermes flavipes* in response to a naturally  
464 occurring isolate of *Metarhizium anisopliae*. *Sociobiology* **40**, 243-255.
- 465 12. Rosengaus R.B., Maxmen A.B., Coates L.E., Traniello J.F.A. 1998 Disease resistance: a benefit of  
466 sociality in the dampwood termite *Zootermopsis angusticollis* (Isoptera: Termopsidae). *Behav Ecol Sociobiol*  
467 **44**(2), 125-134. (doi:10.1007/s002650050523).
- 468 13. Liu L., Li G., Sun P., Lei C., Huang Q. 2015 Experimental verification and molecular basis of active  
469 immunization against fungal pathogens in termites. *Sci Rep* **5**, 15106. (doi:10.1038/srep15106).
- 470 14. Kramm K.R., West D.F., Rockenbach P.G. 1982 Termite pathogens: Transfer of the entomopathogen  
471 *Metarhizium anisopliae* between *Reticulitermes* sp. termites. *J Invertebr Pathol* **40**(1), 1-6. (doi:10.1016/0022-  
472 2011(82)90029-5).
- 473 15. Yanagawa A., Shimizu S. 2007 Resistance of the termite, *Coptotermes formosanus* Shiraki to  
474 *Metarhizium anisopliae* due to grooming. *Biocontrol* **52**(1), 75-85. (doi:10.1007/s10526-006-9020-x).
- 475 16. Yanagawa A., Fujiwara-Tsujii N., Akino T., Yoshimura T., Yanagawa T., Shimizu S. 2011 Behavioral  
476 changes in the termite, *Coptotermes formosanus* (Isoptera), inoculated with six fungal isolates. *J Invertebr*  
477 *Pathol* **107**(2), 100-106. (doi:10.1016/j.jip.2011.03.003).
- 478 17. Myles T.G. 2002 Laboratory studies on the transmission of *Metarhizium anisopliae* in the eastern  
479 subterranean termite, *Reticulitermes flavipes* (Isoptera: Rhinotermitidae), with a method for applying  
480 appropriate doses of conidia to trapped termites for release. *Sociobiology* **40**, 265-276.
- 481 18. Logan J.W.M., Cowie R.H., Wood T.G. 2009 Termite (Isoptera) control in agriculture and forestry by  
482 non-chemical methods: a review. *Bull Entomol Res* **80**(03), 309-330. (doi:10.1017/s0007485300050513).
- 483 19. Chouvenc T., Su N.-Y., Elliott M.L. 2008 Interaction Between the Subterranean Termite *Reticulitermes*  
484 *flavipes* (Isoptera: Rhinotermitidae) and the Entomopathogenic Fungus *Metarhizium anisopliae* in Foraging  
485 Arenas. *J Econ Entomol* **101**(3), 885-893. (doi:10.1093/jee/101.3.885).
- 486 20. Rosengaus R.B., Traniello J.F.A., Bulmer M.S. 2010 Ecology, Behavior and Evolution of Disease  
487 Resistance in Termites. In *Biology of Termites: a Modern Synthesis* (eds. Bignell D.E., Roisin Y., Lo N.), pp. 165-  
488 191. Dordrecht, Springer.
- 489 21. Sun Q., Haynes K.F., Zhou X., Ayasse M. 2017 Dynamic changes in death cues modulate risks and  
490 rewards of corpse management in a social insect. *Funct Ecol* **31**(3), 697-706. (doi:10.1111/1365-2435.12754).
- 491 22. Neoh K.B., Yeap B.K., Tsunoda K., Yoshimura T., Lee C.Y. 2012 Do termites avoid carcasses? Behavioral  
492 responses depend on the nature of the carcasses. *PLoS One* **7**(4), e36375. (doi:10.1371/journal.pone.0036375).
- 493 23. Chouvenc T., Su N.Y. 2012 When subterranean termites challenge the rules of fungal epizootics. *PLoS*  
494 *One* **7**(3), e34484. (doi:10.1371/journal.pone.0034484).
- 495 24. Strack B.H. 1998 The role of social behaviour of *Reticulitermes flavipes* (Kollar) (Isoptera:  
496 Rhinotermitidae) in defence against the fungal pathogen *Metarhizium anisopliae* (Metschikoff) Sorokin  
497 (Deuteromycotina: Hyphomycetes), National Library of Canada = Bibliothèque nationale du Canada.

- 498 25. Yanagawa A., Yokohari F., Shimizu S. 2009 The role of antennae in removing entomopathogenic fungi  
499 from cuticle of the termite, *Coptotermes formosanus*. *J Insect Sci* **9**, 6. (doi:10.1673/031.009.0601).
- 500 26. Yanagawa A., Yokohari F., Shimizu S. 2010 Influence of fungal odor on grooming behavior of the  
501 termite, *Coptotermes formosanus*. *J Insect Sci* **10**, 141. (doi:10.1673/031.010.14101).
- 502 27. Chouvenc T., Su N.Y., Robert A. 2009 Inhibition of *Metarhizium anisopliae* in the alimentary tract of  
503 the eastern subterranean termite *Reticulitermes flavipes*. *J Invertebr Pathol* **101**(2), 130-136.  
504 (doi:10.1016/j.jip.2009.04.005).
- 505 28. Hänel H. 1982 The life cycle of the insect pathogenic fungus *Metarhizium anisopliae* in the termite  
506 *Nasutitermes exitiosus*. *Mycopathologia* **80**(3), 137-145. (doi:10.1007/bf00437576).
- 507 29. Hall M.D., Bento G., Ebert D. 2017 The Evolutionary Consequences of Stepwise Infection Processes.  
508 *Trends Ecol Evol* **32**(8), 612-623. (doi:10.1016/j.tree.2017.05.009).
- 509 30. Becker G. 1969 Rearing of Termites and Testing Methods Used in the Laboratory. In *Biology of*  
510 *Termites* (eds. Krishna K., Weesner F.M.), pp. 351-385. New York, Academic Press.
- 511 31. Chouvenc T., Su N.Y., Robert A. 2009 Cellular encapsulation in the eastern subterranean termite,  
512 *Reticulitermes flavipes* (Isoptera), against infection by the entomopathogenic fungus *Metarhizium anisopliae*. *J*  
513 *Invertebr Pathol* **101**(3), 234-241. (doi:10.1016/j.jip.2009.05.008).
- 514 32. Kramm K.R., West D.F. 1982 Termite pathogens: Effects of ingested *Metarhizium*, *Beauveria*, and  
515 *Gliocladium* conidia on worker termites (*Reticulitermes* sp.). *J Invertebr Pathol* **40**(1), 7-11. (doi:10.1016/0022-  
516 2011(82)90030-1).
- 517 33. Gao Q., Bidochka M.J., Thompson G.J. 2011 Effect of group size and caste ratio on individual  
518 survivorship and social immunity in a subterranean termite. *Acta Ethol* **15**(1), 55-63. (doi:10.1007/s10211-011-  
519 0108-7).
- 520 34. Traniello J.F., Rosengaus R.B., Savoie K. 2002 The development of immunity in a social insect: evidence  
521 for the group facilitation of disease resistance. *Proc Natl Acad Sci U S A* **99**(10), 6838-6842.  
522 (doi:10.1073/pnas.102176599).
- 523 35. Evans T.A. 2000 Fast marking of termites (Isoptera: Rhinotermitidae). *Sociobiology* **35**(3), 517-523.
- 524 36. Altmann J. 1974 Observational Study of Behavior: Sampling Methods. *Behaviour* **49**(3), 227-267.  
525 (doi:10.1163/156853974X00534).
- 526 37. Hertel H., Hanspach A., Plarre R. 2010 Differences in Alarm Responses in Drywood and Subterranean  
527 Termites (Isoptera: Kalotermitidae and Rhinotermitidae) to Physical Stimuli. *J Insect Behav* **24**(2), 106-115.  
528 (doi:10.1007/s10905-010-9240-x).
- 529 38. R Core Team 2017 R: A Language and Environment for Statistical Computing. Vienna, Austria: R  
530 Foundation for Statistical Computing. <https://www.R-project.org/>.
- 531 39. Bates D., Mächler M., Bolker B., Walker S. 2015 Fitting Linear Mixed-Effects Models Using lme4. *J Stat*  
532 *Softw* **67**. (doi:10.18637/jss.v067.i01).
- 533 40. Crawley M.J. 2015 *Statistics: An introduction using R (2nd Edition)*. Chichester, John Wiley & Sons, Ltd.
- 534 41. Korner-Nievergelt F., Roth T., von Felten S., Guélat J., Almasi B., Korner-Nievergelt P. 2015 *Bayesian*  
535 *data analysis in ecology using linear models with R, BUGS and Stan*. London, Elsevier.
- 536 42. Hothorn T., Bretz F., Westfall P. 2008 Simultaneous inference in general parametric models. *Biom J*  
537 **50**(3), 346-363. (doi:10.1002/bimj.200810425).
- 538 43. Therneau T.M. 2015 A Package for Survival Analysis in S. Version 2.38. [https://CRAN.R-](https://CRAN.R-project.org/package=survival)  
539 [project.org/package=survival](https://CRAN.R-project.org/package=survival).
- 540 44. Therneau T.M., Grambsch P.M. 2000 *Modeling Survival Data: Extending the Cox Model*. New York,  
541 Springer.
- 542 45. Kassambara A., Kosinski M. 2017 survminer: Drawing Survival Curves using 'ggplot2'. R package version  
543 0.4.1. <https://CRAN.R-project.org/package=survminer>.
- 544 46. Therneau T.M. 2018 coxme: Mixed Effects Cox Models. R package version 2.2-7. [https://CRAN.R-](https://CRAN.R-project.org/package=coxme)  
545 [project.org/package=coxme](https://CRAN.R-project.org/package=coxme).
- 546 47. Tragust S., Ugelvig L.V., Chapuisat M., Heinze J., Cremer S. 2013 Pupal cocoons affect sanitary brood  
547 care and limit fungal infections in ant colonies. *BMC Evol Biol* **13**, 225. (doi:10.1186/1471-2148-13-225).
- 548 48. Rosengaus R.B., Jordan C., Lefebvre M.L., Traniello J.F. 1999 Pathogen Alarm Behavior in a Termite: A  
549 New Form of Communication in Social Insects. *Naturwissenschaften* **86**(11), 544-548. (doi:  
550 10.1007/s001140050672)
- 551 49. Yanagawa A., Fujiwara-Tsujii N., Akino T., Yoshimura T., Yanagawa T., Shimizu S. 2011 Musty odor of  
552 entomopathogens enhances disease-prevention behaviors in the termite *Coptotermes formosanus*. *J Invertebr*  
553 *Pathol* **108**(1), 1-6. (doi:10.1016/j.jip.2011.06.001).

- 554 50. Beshers S.N., Fewell J.H. 2001 Models of division of labor in social insects. *Annu Rev Entomol* **46**, 413-  
555 440. (doi:10.1146/annurev.ento.46.1.413).
- 556 51. Aimanianda V., Bayry J., Bozza S., Kniemeyer O., Perruccio K., Elluru S.R., Clavaud C., Paris S., Brakhage  
557 A.A., Kaveri S.V., et al. 2009 Surface hydrophobin prevents immune recognition of airborne fungal spores.  
558 *Nature* **460**(7259), 1117-1121. (doi:10.1038/nature08264).
